# Supplementary material for: Reactivity of Fe-amended biochar for phosphorus removal and recycling from wastewater
Source: PLOS journal article supplement (doi:10.1371/journal.pwat.0000092), 2023-04-28
Supplement: S6 (10.1371/journal.pwat.0000092.s006) [file journal.pwat.0000092.s006]

**S2 Table**. Phosphorus loading on biochar and activated carbon used in release experiments and on samples used for XANES analysis.

| Sample | Incubation P concentration (mg/L) | Total P (mg/kg) |
| --- | --- | --- |
| BN | 0 | 359 |
| BN 2% Fe1 | 10 | 329 |
| AC | 0 | 953 |
| AC 2% Fe | 10 | 1462 |
| AD | 0 | 16334 |
| AD 2% Fe | 10 | 16992 |

1A separate lot of biochar was acquired for this experiment, which had a slightly lower inherent total P value.
